# Supplementary material for: Neat C60:C70 buckminsterfullerene mixtures enhance polymer solar cell performance
Source: Royal Society of Chemistry journal article supplement (doi:10.1039/c4ta02515f), 2014-01-01
Supplement: c4ta02515f1.pdf [file c4ta02515f1.pdf]

## Supplementary Information

### **Neat C<sub>60</sub>:C<sub>70</sub> buckminsterfullerene mixtures enhance polymer solar cell performance**

Amaia Diaz de Zerio Mendaza,<sup>1</sup> Jonas Bergqvist,<sup>2</sup> Olof Bäcké,<sup>3</sup> Camilla Lindqvist,<sup>1</sup> Renee Kroon,<sup>1,4</sup> Feng Gao,<sup>2</sup> Mats R. Andersson,<sup>1,4</sup> Eva Olsson,<sup>3</sup> Olle Inganäs,<sup>2</sup> Christian Müller<sup>1,\*</sup>

<sup>1</sup>Department of Chemical and Biological Engineering/Polymer Technology, Chalmers University of Technology, 41296 Göteborg, Sweden

<sup>2</sup>Biomolecular and Organic Electronics, IFM, Linköping University, 58183 Linköping, Sweden

<sup>3</sup>Department of Applied Physics, Chalmers University of Technology, 41296 Göteborg, Sweden

<sup>4</sup>Ian Wark Research Institute, University of South Australia, Mawson Lakes, South Australia 5095, Australia

\*e-mail: [christian.muller@chalmers.se](mailto:christian.muller@chalmers.se)

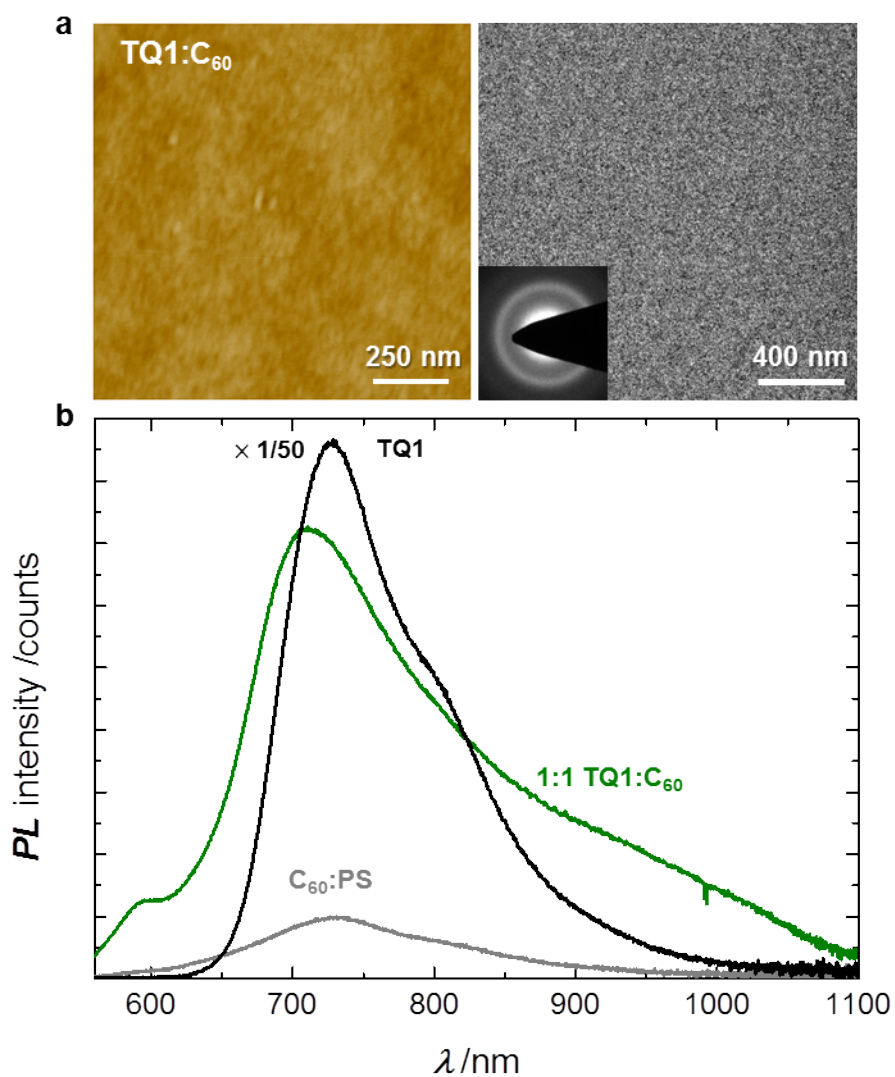

**Figur**

**e S1.** (a) AFM height image and TEM bright field image of a 1:1 TQ1:C<sub>60</sub> film; inset: SAED pattern; (b) Photoluminescence (PL) spectra of a neat TQ1 film (black, signal reduced 50 times), 1:1 C<sub>60</sub>:PS (grey) and 1:1 TQ1:C<sub>60</sub> (green). Note that neat C<sub>60</sub> was spin coated together with polystyrene (PS) to ease film formation.

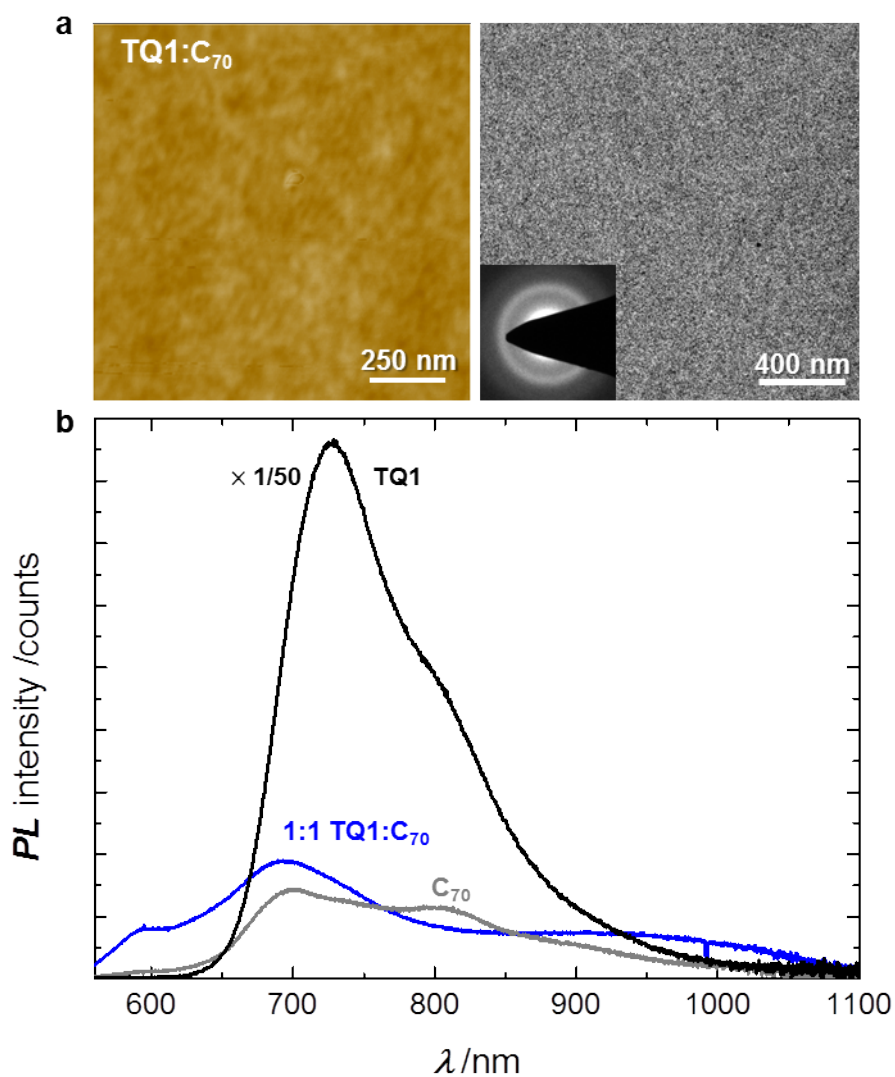

**Figur**

**e S2.** (a) AFM height image and TEM bright field image of a 1:1 TQ1:C<sub>70</sub> film; inset: SAED pattern; (b) Photoluminescence (PL) spectra of a neat TQ1 film (black, signal reduced 50 times), C<sub>70</sub> (grey) and 1:1 TQ1:C<sub>70</sub> (blue).

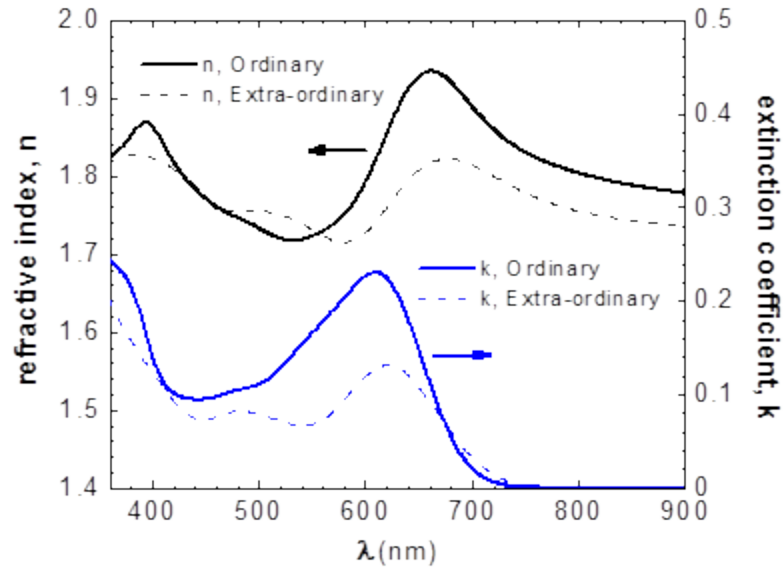

**Figure S3.** Ordinary and extra-ordinary refractive index  $n$  and extinction coefficient  $k$  obtained by modelling variable-angle spectroscopic ellipsometry (VASE) spectra of a 225 nm thick 2:1:1 TQ1:C<sub>60</sub>:C<sub>70</sub> film on a Si substrate with ~1 nm native oxide.

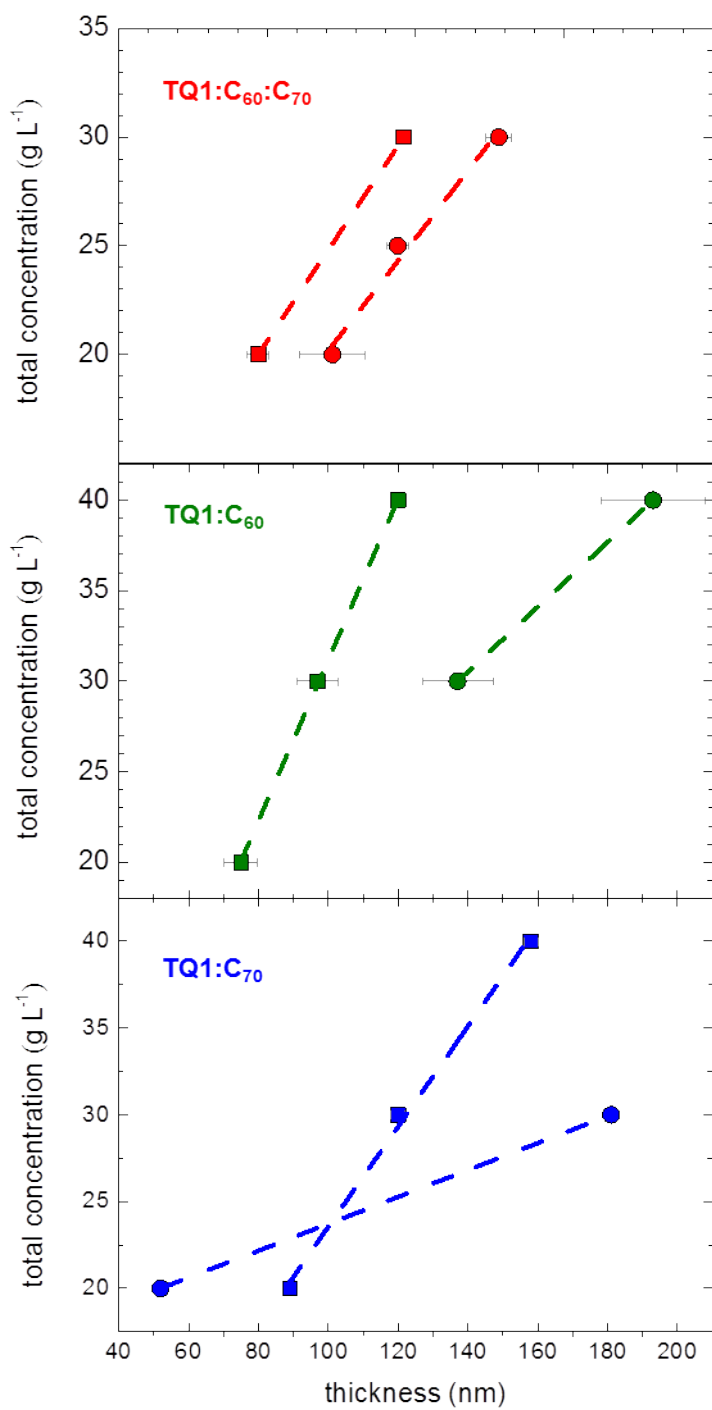

**Figure S4.** Active layer thickness as a function of total solution concentration for 2:1:1 TQ1:C<sub>60</sub>:C<sub>70</sub> (red), 1:1 TQ1:C<sub>60</sub> (green) and 1:1 TQ1:C<sub>70</sub> (blue) for 1000 rpm (cubes) and 500 rpm (circles) spin-coating speeds.
